# Supplementary material for: Boosting Mitochondrial Biogenesis Diminishes Foam Cell Formation in the Post-Stroke Brain
Source: MDPI journal article supplement (doi:10.3390/ijms242316632), 2023-11-23
Supplement: s1 [file s1]

Supplementary Figures

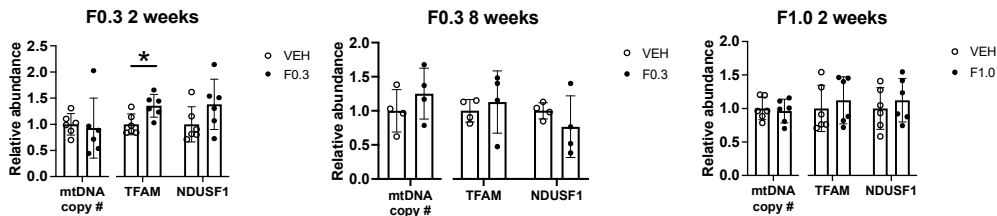

**Supplementary Figure S1.** Mitochondrial marker levels did not differ significantly between the treatment groups on the contralateral side, except for TFAM, which was elevated in mice treated with formoterol 0.3 mg/kg for 2 weeks.  $t(9.935)=2.940$ ,  $*p=0.0149$ , unpaired two-tailed t-test with Welch's correction.  $n=4-6$ . Data presented as mean  $\pm$  SD.

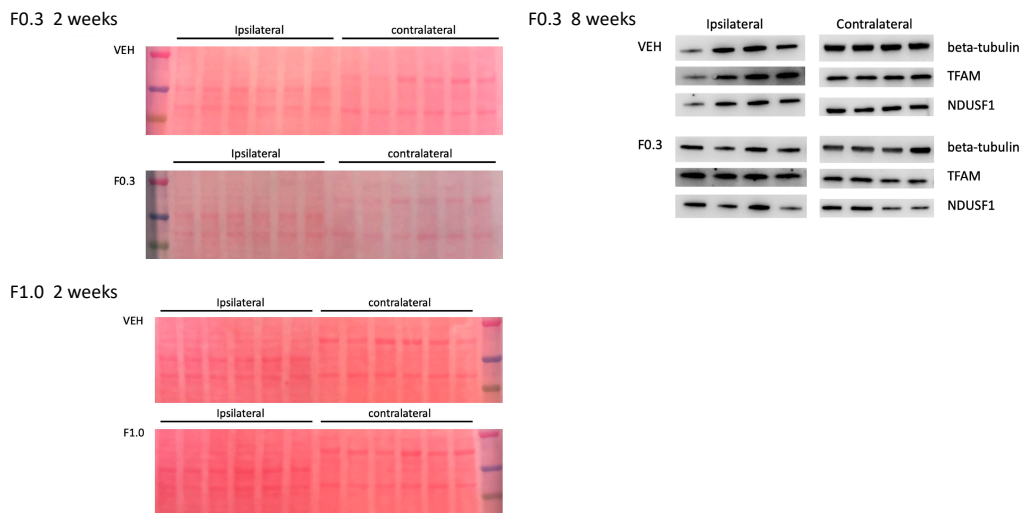

**Supplementary Figure S2.** Original images of Western Blots.
